# Supplementary material for: Kinetochores grip microtubules with directionally asymmetric strength
Source: PubMed Central journal article supplement (PMC11533501; doi:10.1083/jcb.202405176), 2024-11-01

SourceDataFS5. Unedited/uncropped Coomassie-stained SDS-PAGE analyses of the recombinantly purified yeast and human Ndc80 complexes.

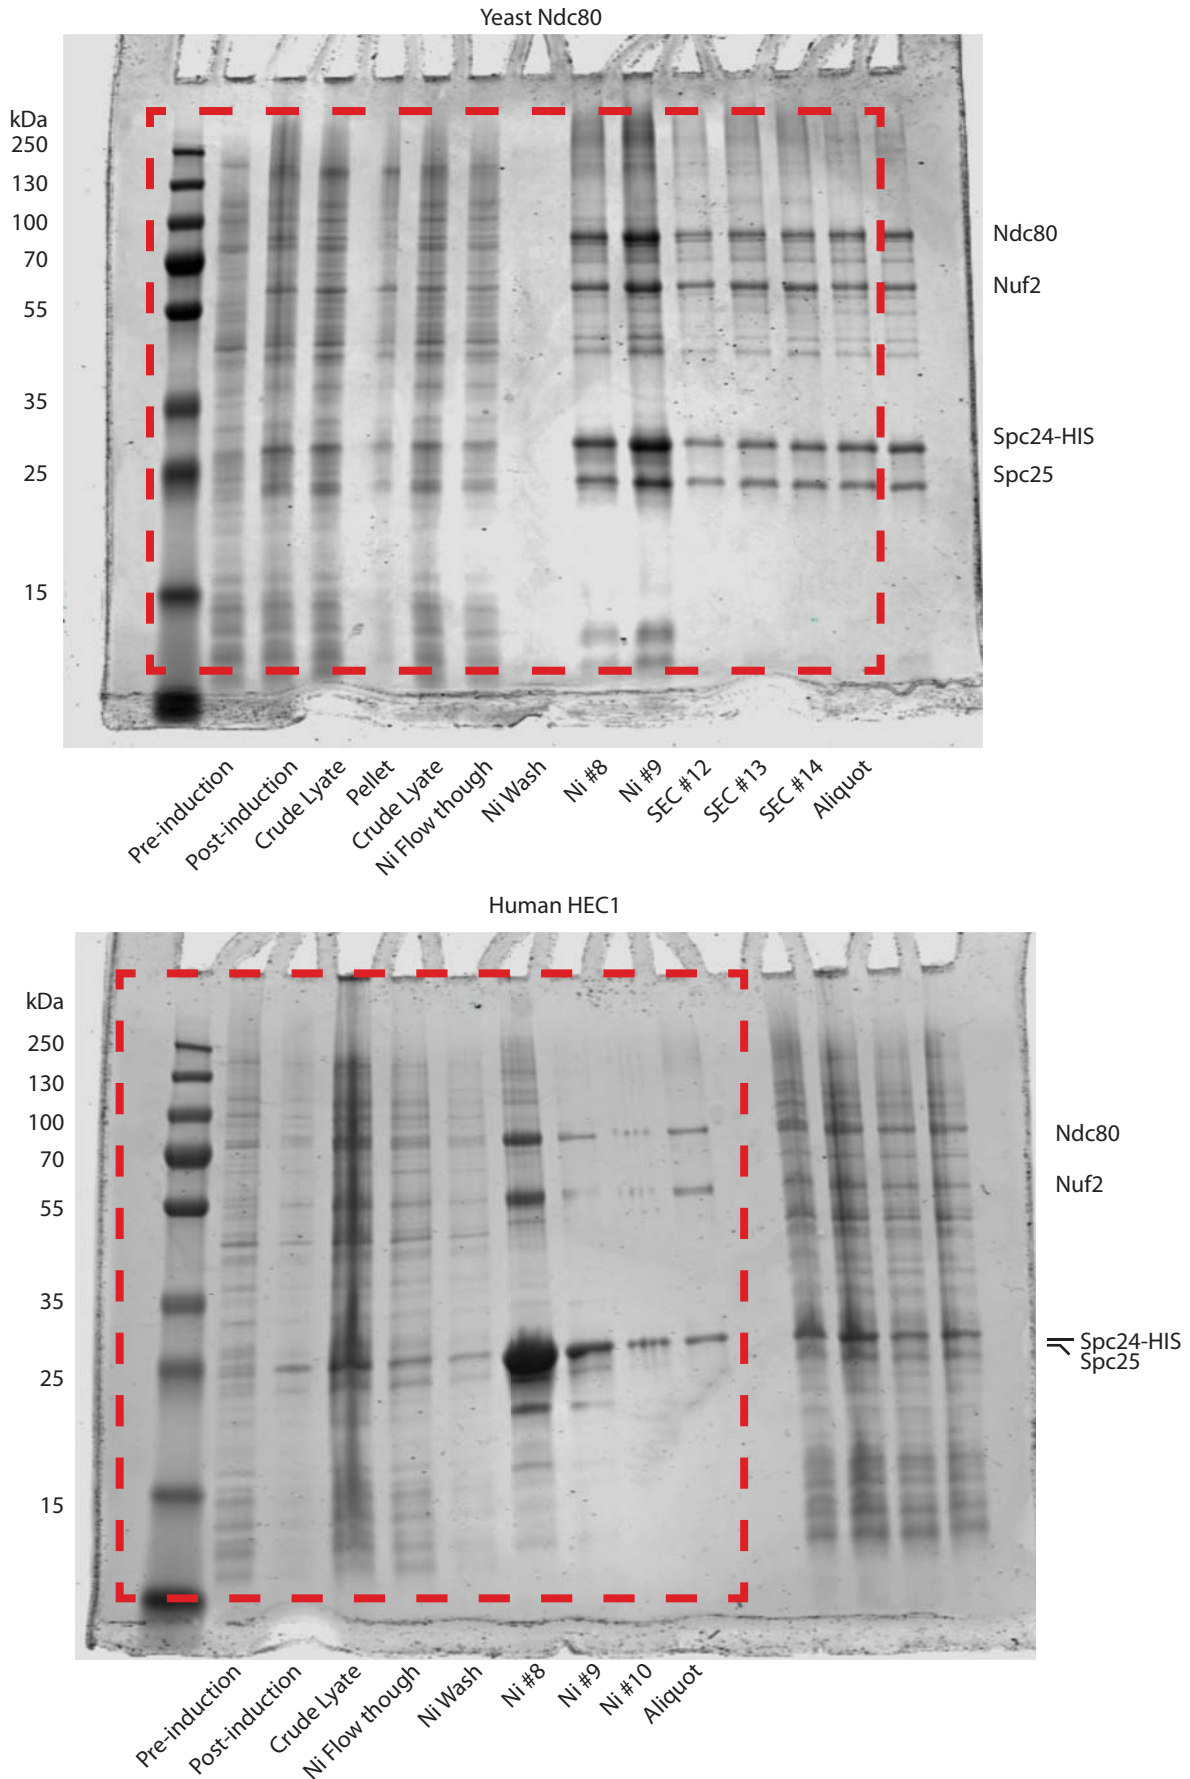

Supplement: JCB_202405176_SourceDataFS5.pdf [file JCB_202405176_SourceDataFS5.pdf]
